# Supplementary material
Source: Elsevier journal article supplement (https://www.sciencedirect.com/science/article/pii/S1885585725003639)
Supplement: mmc1 [file mmc1.pdf]

## SUPPLEMENTARY DATA

**Table S1.** Bone scintigraphy imaging

| Grading                        | Value      |
|--------------------------------|------------|
| Perugini grade 0               | 44 (10.0)  |
| Perugini grade 1               | 40 (9.0)   |
| Perugini grade 2               | 26 (5.9)   |
| Perugini grade 3               | 210 (47.5) |
| Not performed                  | 89 (20.1)  |
| Missing                        | 33 (7.5)   |
| Data are expressed as no. (%). |            |

**Table S2.** Type of mutation (N = 442)

| Mutation    | Value      |
|-------------|------------|
| p.Val30Met  | 287 (64.9) |
| p.Val122Ile | 95 (21.5)  |
| p.Glu89Lys  | 23 (5.2)   |
| p.Ser97Tyr  | 13 (2.9)   |
| p.Ala65Thr  | 5 (1.1)    |
| p.Val122Del | 4 (0.9)    |
| p.Ser43Asn  | 3 (0.7)    |
| p.Leu32Val  | 3 (0.7)    |
| p.Asp38Asn  | 2 (0.5)    |
| p.Glu89Gln  | 2 (0.5)    |
| p.Val71Ala  | 1 (0.2)    |
| p.Glu74Gln  | 1 (0.2)    |
| p.Ala128Val | 1 (0.2)    |
| p.Ser50Arg  | 1 (0.2)    |
| p.Thr69Ile  | 1 (0.2)    |
|             |            |

Data are expressed as No. (%).



**Table S3.** Comparison of groups according to treatment status (treated and untreated with tafamidis, patisiran, and/or inotersen)

| Characteristic                | Untreated  |                  | Treated <sup>a</sup> |                  | <i>P</i>            |
|-------------------------------|------------|------------------|----------------------|------------------|---------------------|
|                               | Value      | No. <sup>b</sup> | Value                | No. <sup>b</sup> |                     |
| <i>Age</i> ≥ 80 y             | 32 (22.4)  | 143              | 6 (3.2)              | 187              | < .001 <sup>a</sup> |
| <i>Male sex</i>               | 77 (53.1)  | 145              | 149 (75.3)           | 198              | < .001 <sup>a</sup> |
| <i>FEV<sub>1</sub></i> ≤ 50 % | 36 (27.1)  | 133              | 39 (21.2)            | 184              | .280 <sup>a</sup>   |
| <i>NYHA</i>                   |            |                  |                      |                  |                     |
| I+II                          | 119 (86.9) | 137              | 182 (92.9)           | 196              | .101 <sup>a</sup>   |
| III+IV                        | 278 (86.3) | 137              | 298 (92.5)           | 196              |                     |

FEV<sub>1</sub>, forced expiratory volume in 1 second; NYHA, New York Heart Association functional class.

<sup>a</sup>Chi-square test.

<sup>b</sup>No. number of patients with available data. Data are expressed as No. (%).

**Table S4.** Death case numbers by group

| Characteristic             | Value     |                          | Value     | <i>P</i> <sup>a</sup> |
|----------------------------|-----------|--------------------------|-----------|-----------------------|
| p.Val30Met [261]           | 55 (21.1) | Other mutation [n = 150] | 35 (23.3) | .682                  |
| p.Val122Ile [91]           | 24 (26.4) | Other mutation [n = 320] | 66 (20.6) | .305                  |
| p.Glu89Lys [23]            | 4 (17.4)  | Other mutation [n = 388] | 86 (22.2) | .781                  |
| Neuropathy [262]           | 63 (24.0) | Non-neuropathy [n = 148] | 26 (17.6) | .160                  |
| Treated <sup>b</sup> [259] | 41 (15.8) | Untreated [n = 141]      | 44 (31.2) | < .001                |

Data are expressed as No. (%). The number of patients with available data is expressed in brackets.

<sup>a</sup>Chi-square test.

<sup>b</sup>Treated and untreated with tafamidis, patisiran, inotersen and/or liver transplantation

Figure S1. Patient characteristics

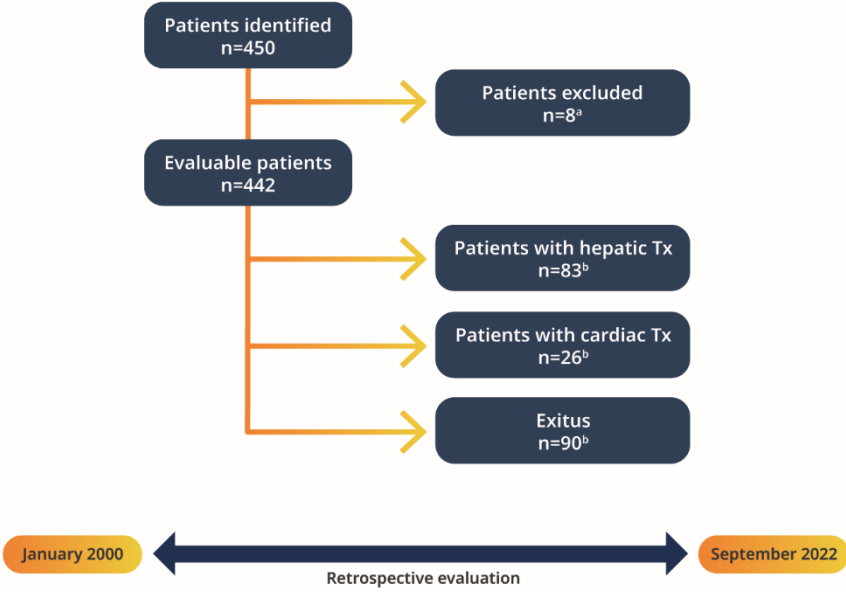

Correcciones a la figura S1.

Poner espacio a ambos lados de “=”

Añadir Tx, transplantation al pie de la figura

Tacher a y b en superíndice

Figure S2. Number of patients provided per center

| SITE                          | REGION              | CITY              | N          |
|-------------------------------|---------------------|-------------------|------------|
| H.U. Son Llàtzer              | Balearic Islands    | Palma de Mallorca | 54         |
| H.U. Puerta de Hierro         | Community of Madrid | Madrid            | 49         |
| H.U. Bellvitge                | Catalonia           | Barcelona         | 42         |
| H.U. Juan Ramón Jiménez       | Andalusia           | Huelva            | 36         |
| H.U. La Fe                    | Valencian Community | Valencia          | 32         |
| H.U. Son Espases              | Balearic Islands    | Palma de Mallorca | 23         |
| H.U. Virgen de la Victoria    | Andalusia           | Málaga            | 18         |
| H.U. Araba - Txagorritxu      | Basque Country      | Vitoria           | 17         |
| H.U. Vall d'Hebron            | Catalonia           | Barcelona         | 14         |
| Hospital Clínic               | Catalonia           | Barcelona         | 12         |
| C.A.U. de Salamanca           | Castile and Leon    | Salamanca         | 11         |
| H.G.U. Gregorio Marañón       | Community of Madrid | Madrid            | 10         |
| H.U. Reina Sofía              | Andalusia           | Córdoba           | 10         |
| H.U. Virgen de las Nieves     | Andalusia           | Granada           | 10         |
| H.U. 12 de Octubre            | Community of Madrid | Madrid            | 9          |
| H.U. Donostia                 | Basque Country      | Guipúzcoa         | 9          |
| H.U. Virgen de la Arrixaca    | Region of Murcia    | Murcia            | 8          |
| Hospital Marina Salud         | Valencian Community | Valencia          | 8          |
| H.U. de Jaén                  | Andalusia           | Jaén              | 7          |
| C.H.U. de A Coruña            | Galicia             | A Coruña          | 7          |
| H.U. Josep Trueta             | Catalonia           | Girona            | 6          |
| H.U. Dr Negrín                | Canary Islands      | Gran Canaria      | 7          |
| H.U. Arnau de Vilanova        | Catalonia           | Lleida            | 6          |
| Hospital Clínico San Carlos   | Community of Madrid | Madrid            | 5          |
| H.U. Basurto (Bilbao)         | Basque Country      | Vizcaya           | 5          |
| H.U. Marqués de Valdecilla    | Cantabria           | Cantabria         | 5          |
| H.C.U. Lozano Blesa           | Aragon              | Zaragoza          | 4          |
| H.H.U. de Galdakao            | Basque Country      | Vizcaya           | 4          |
| H.U. Puerto Real              | Andalusia           | Cádiz             | 4          |
| H.U. Virgen del Rocío         | Andalusia           | Sevilla           | 4          |
| H.U. Ramón y Cajal            | Community of Madrid | Madrid            | 4          |
| H.G.U. de Elche               | Valencian Community | Alicante          | 3          |
| H.U. Ntra. Sra. de Candelaria | Canary Islands      | Tenerife          | 3          |
| H. U. de Navarra              | Navarra             | Pamplona          | 3          |
| H.G.U. de Alicante            | Valencian Community | Alicante          | 2          |
| H.C.U. de Valladolid          | Castile and Leon    | Valladolid        | 2          |
| H. del Mar                    | Catalonia           | Barcelona         | 1          |
| H. Álvaro Cunqueiro           | Galicia             | Pontevedra        | 1          |
| H. U. Toledo                  | Castile-La Mancha   | Toledo            | 1          |
| <b>Total</b>                  |                     |                   | <b>456</b> |

C.A.U., Complejo Asistencial Universitario; C.H.A., Complejo Hospitalario Universitario; H.C.U., Hospital Clínico Universitario; H.G.U., Hospital General Universitario; H.U., hospital Universitario

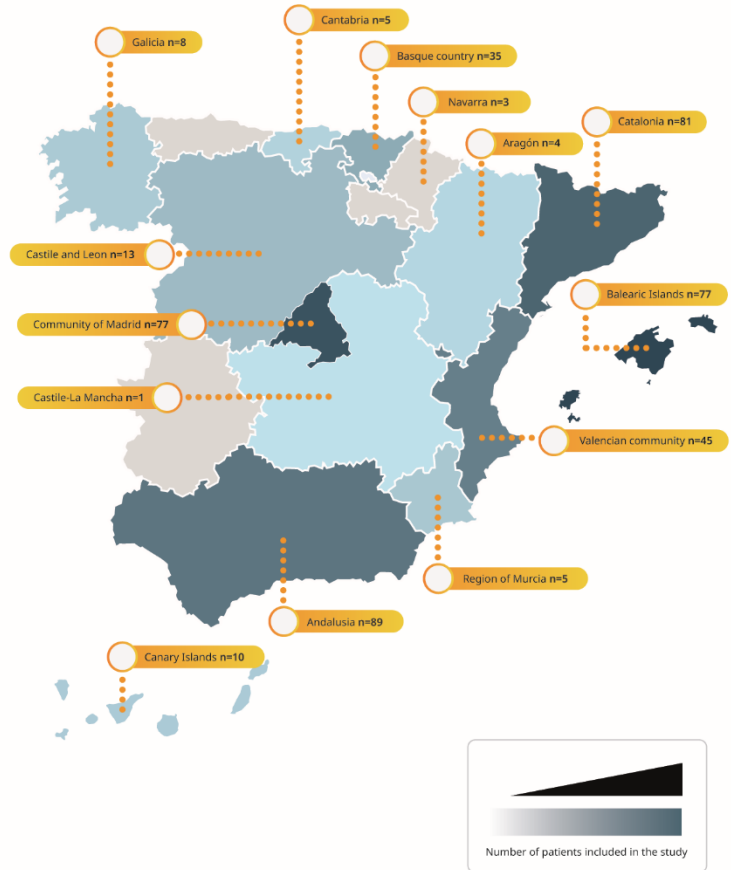

**Correcciones a la figura S2:**

**Poner espacio a ambos lados de “=”**

**Cambiar “Navarra” a “Navarre”**

**Cambiar “N” a “No.” En la tabla**

**Figure S3. Survival**

A)

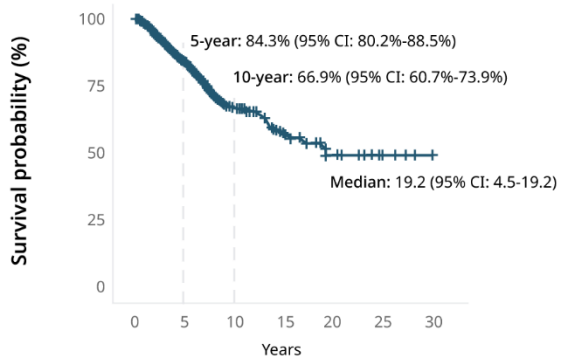

Number at risk

All patients 374 198 79 42 20 9 2

B)

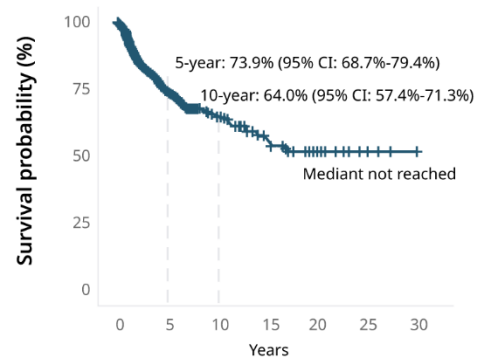

Number at risk

All patients 404 127 58 28 17 8 4

Correcciones a la figura S3

Cerrar "95%CI"

Cambiar "Mediant" a "Median"
